# Supplementary material
Source: PubMed Central journal article supplement (PMC3993787)
Supplement: JVI.00118-14_zjv999098896so1.pdf [file JVI.00118-14_zjv999098896so1.pdf]

## SUPPLEMENTARY INFORMATION

### Supplementary movies legends

**Movie S1.** Single-axis tomogram (corresponding to Figure 7) reconstructed from a ~250 nm thick section of DENV-infected C6/36 cells fixed at 48 hr p.i.. Animation through the tomogram shows identification of vesicle packets (Vp), double membrane vesicles (Ve) containing replication complex (RC), and membrane sac enclosing a collection of virus particles (Vi) and subviral particles (SVP). Vi and SVP were observed within the same Vp, suggesting it is the site for dengue particles assembly. Black arrowheads highlight the Vp area.

**Movie S2.** Single-axis tomogram (corresponding to Figure 8D and 9A) reconstructed from a ~250 nm thick section of DENV-infected C6/36 cells fixed at 48 hr p.i.. Animation through the tomogram shows the connection of Vp membrane and membrane sac enclosing Vi. Colored overlay shows 3-D surface rendered DENV-induced membrane structures. Vp membrane and membrane sac enclosing Vi are depicted in light brown, Ve membrane in brown, RC in green, Vi and SVP in red, and ribosome in light blue. Ribosomes stud the cytoplasmic face of the Vp membrane illustrating rough ER membrane. Scale bar represents 100 nm.

**Movie S3.** Single-axis tomogram (corresponding to Figure 9D and E) reconstructed from a ~250 nm thick section of DENV-infected C6/36 cells fixed at 48 hr p.i.. Animation through the tomogram showing virus particle buds into Vp membrane directly opposing Ve containing a replication complex and pore. Vp and Ve membranes are depicted in

light brown, RC in green, and Vi in red. Black arrowhead highlights the Vi. Scale bar represents 100 nm.
